# Supplementary material for: Preventing Unnecessary Costs of Drug-Induced Hypoglycemia in Older Adults with Type 2 Diabetes in the United States and Canada
Source: PubMed Central journal article supplement (PMC5029920; doi:10.1371/journal.pone.0162951), 2016-09-20

A.

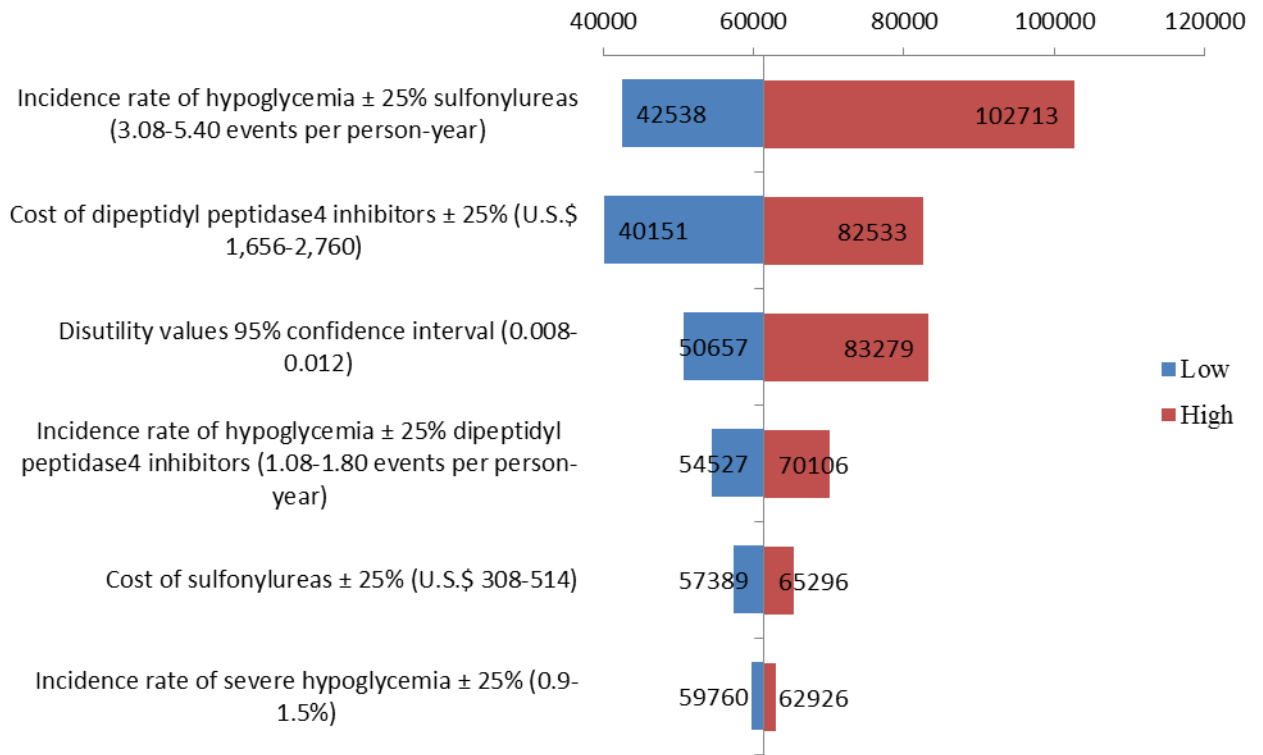

B.

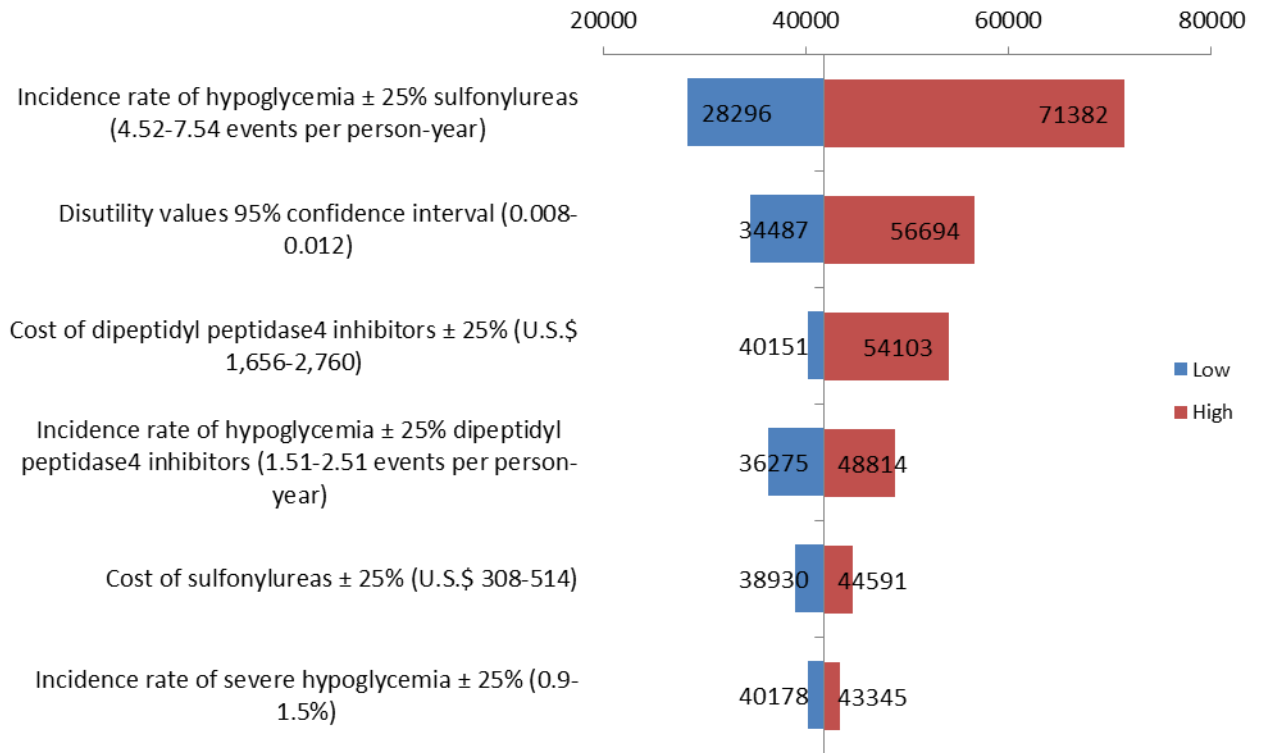

C.

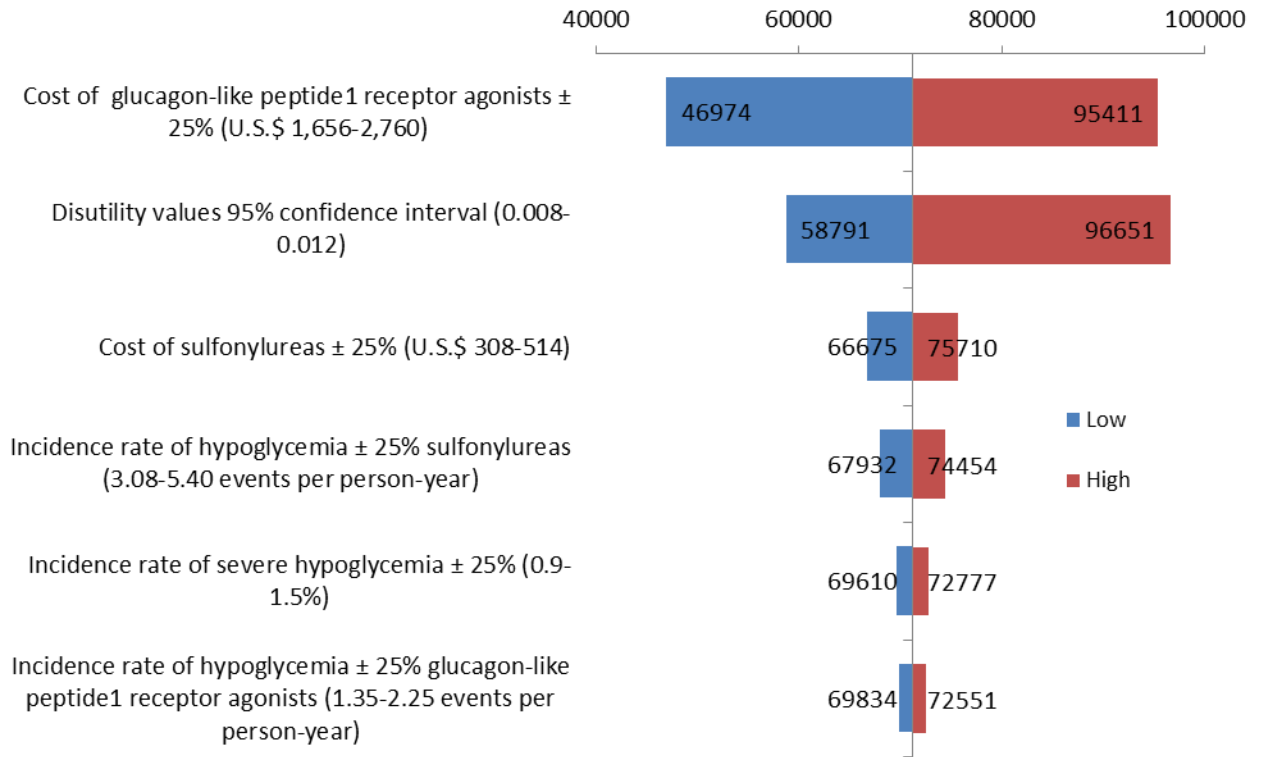

D.

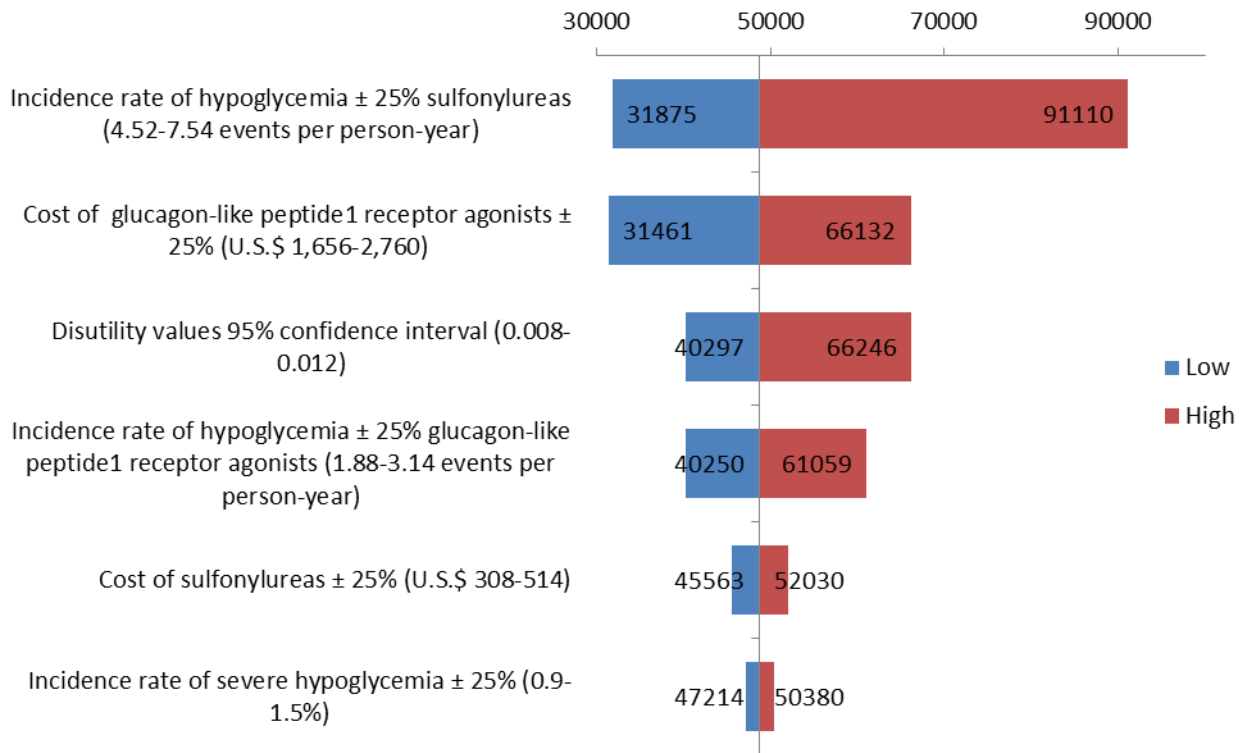

E.

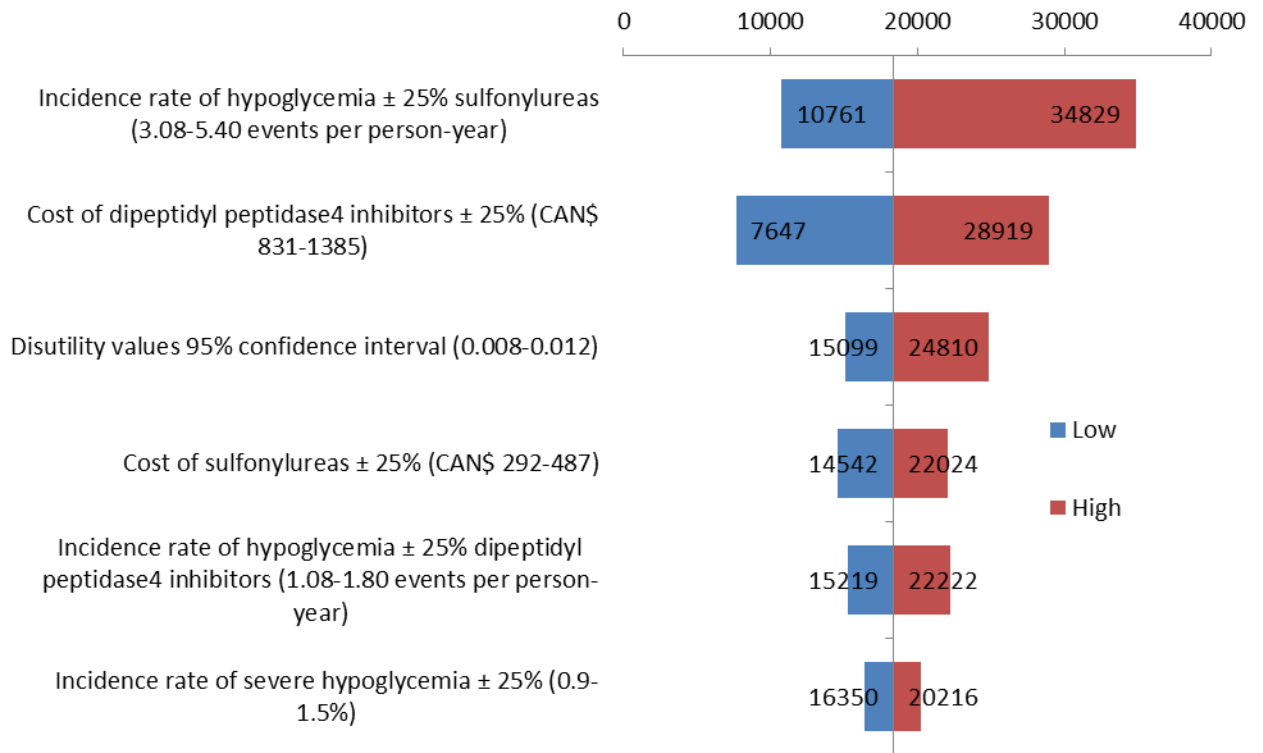

F.

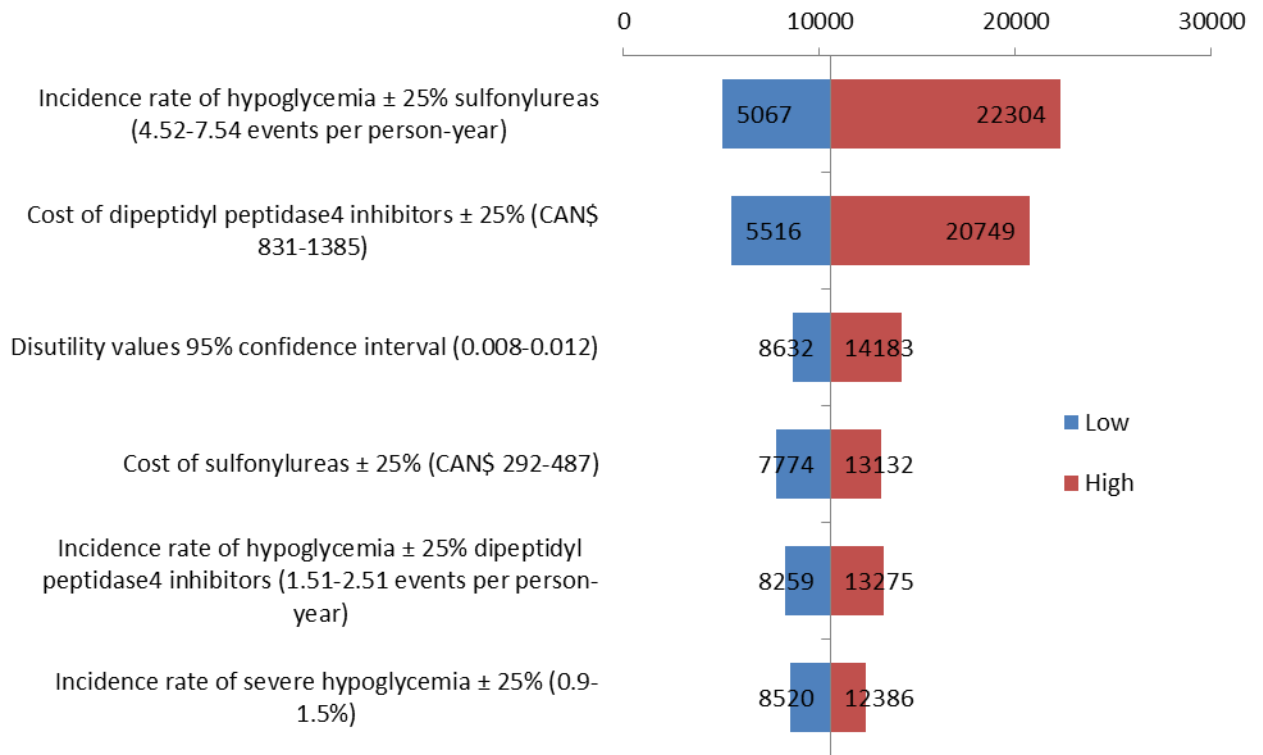

G.

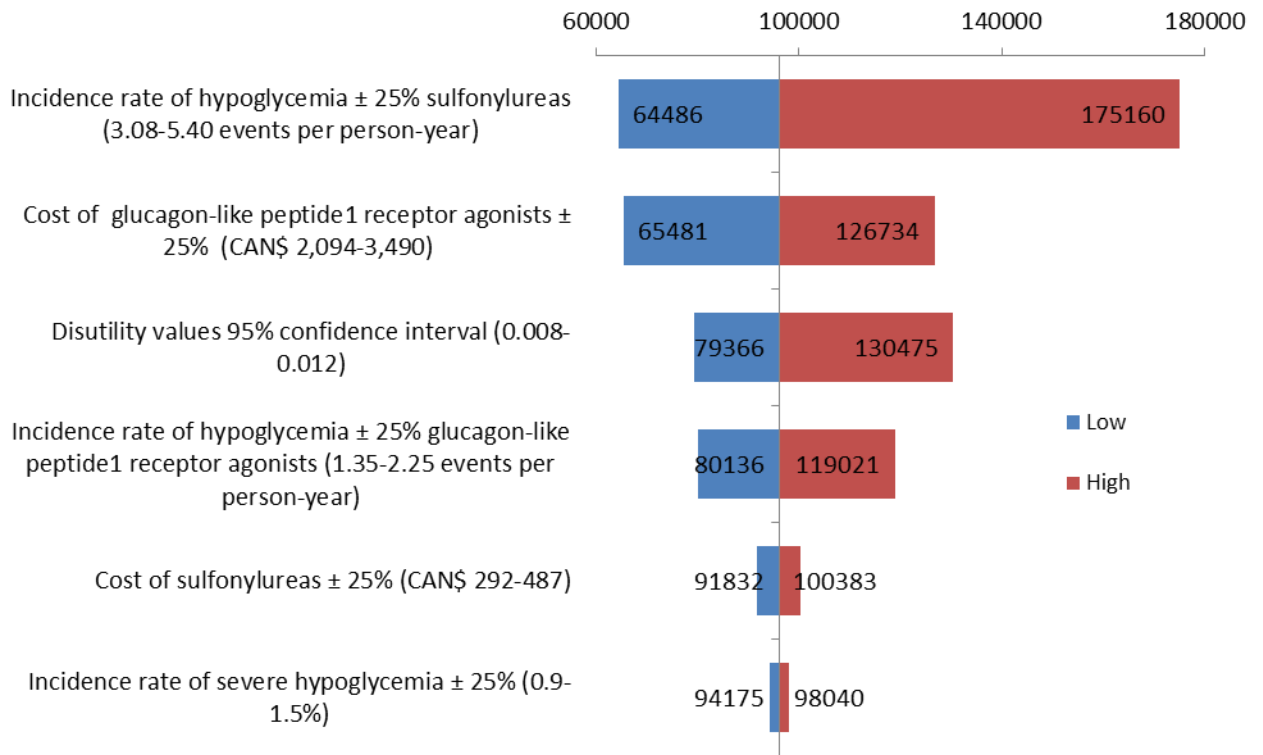

H.

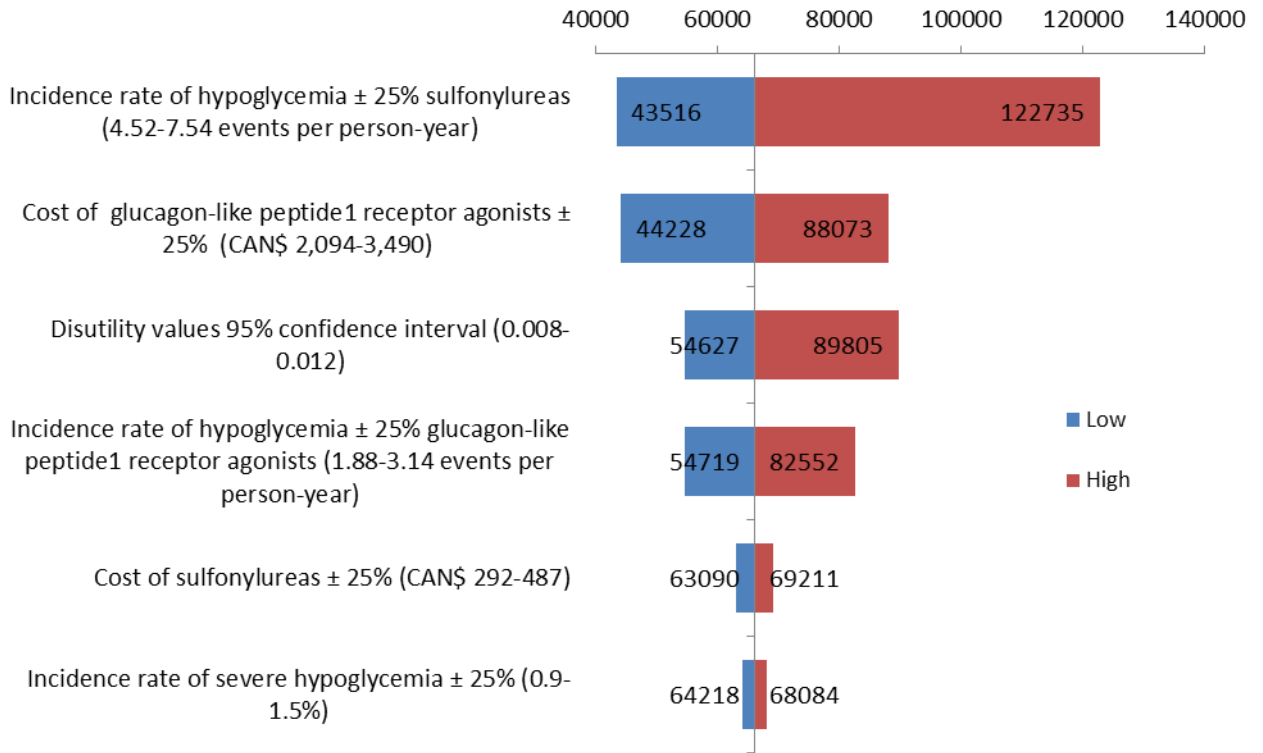

Supplement: pone.0162951.s001.pdf [file pone.0162951.s001.pdf]
