# Supplementary material for: Preventing Unnecessary Costs of Drug-Induced Hypoglycemia in Older Adults with Type 2 Diabetes in the United States and Canada
Source: PubMed Central journal article supplement (PMC5029920; doi:10.1371/journal.pone.0162951), 2016-09-20

A.

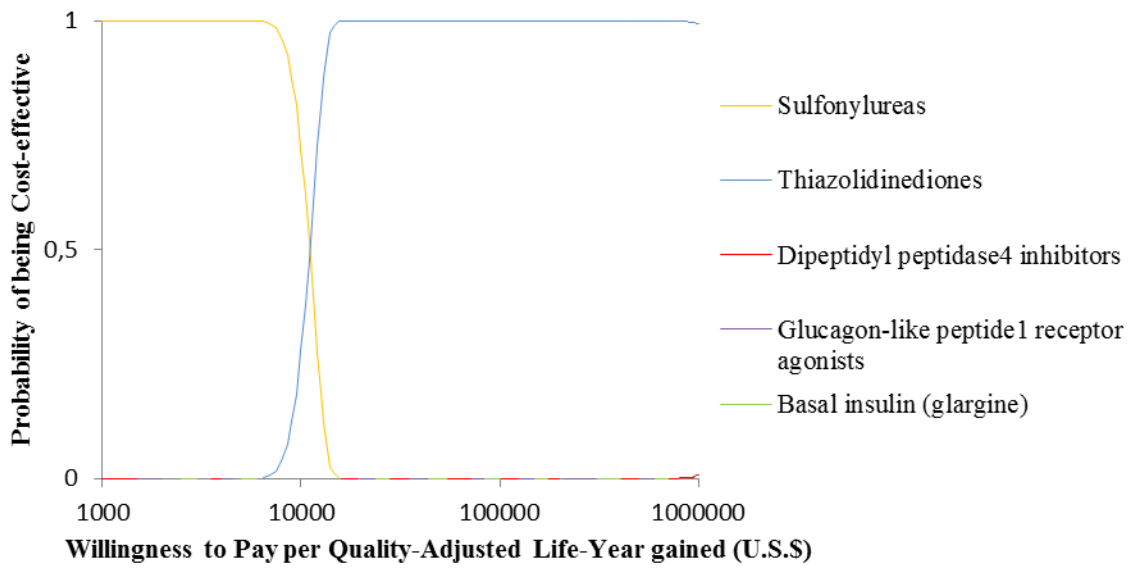

B.

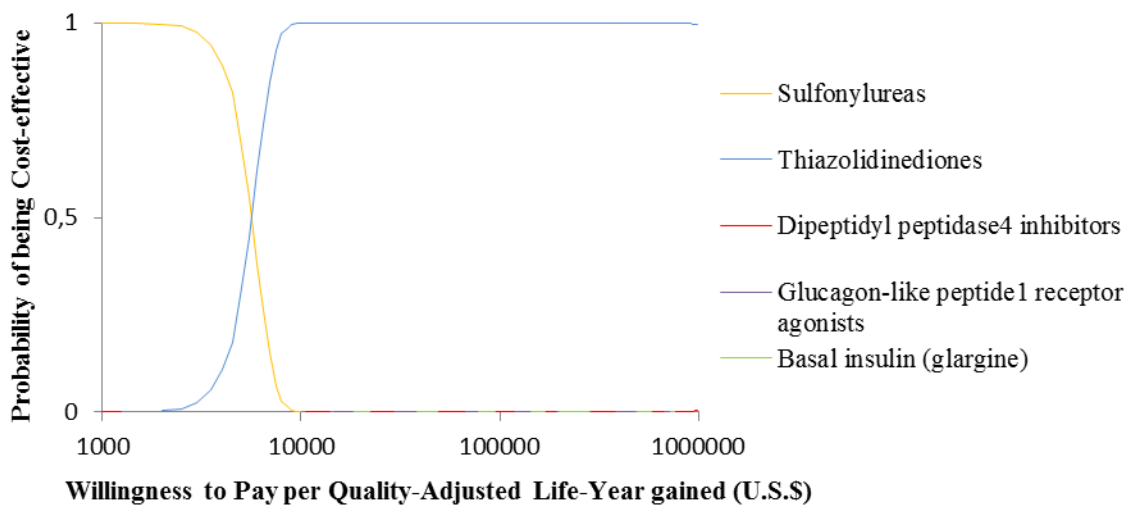

C.

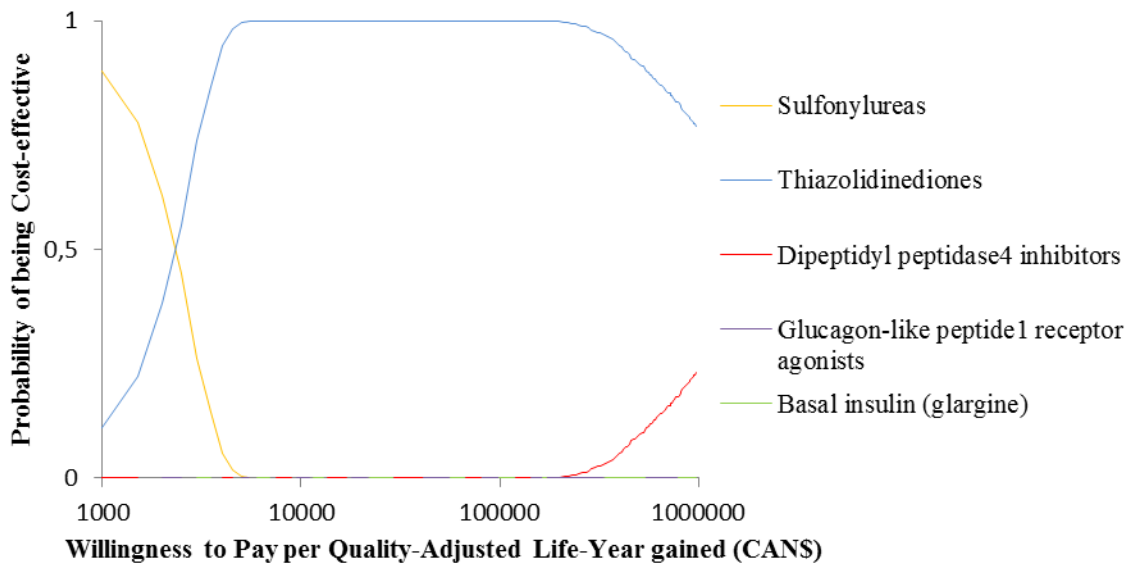

D.

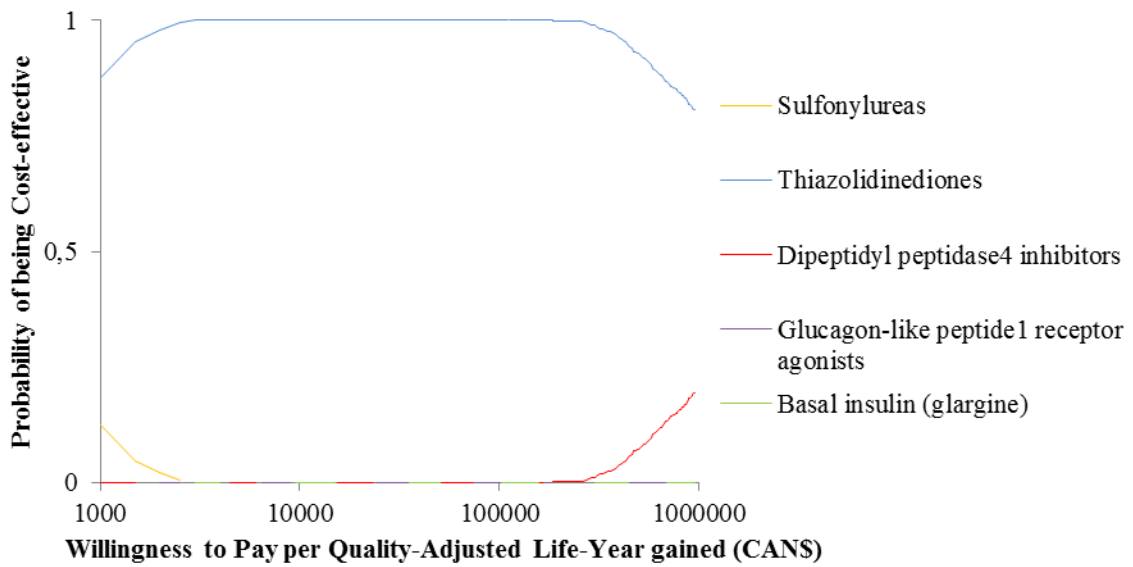

Supplement: pone.0162951.s002.pdf [file pone.0162951.s002.pdf]
